# Supplementary material for: Atomic layer deposition-assisted growth of CuAl LDH on carbon fiber as a peroxidase mimic for colorimetric determination of H2O2 and glucose
Source: Royal Society of Chemistry journal article supplement (doi:10.1039/c8nj06217j), 2019-01-01
Supplement: c8nj06217j1.pdf [file c8nj06217j1.pdf]

## Electronic Supplementary Information

Atomic layer deposition-assisted growth of CuAl LDH on carbon fiber as  
a peroxidase mimic for colorimetric determination of H<sub>2</sub>O<sub>2</sub> and glucose

Lihong Wu,<sup>a</sup> Gengping Wan,<sup>a</sup> Shaohua Shi,<sup>a</sup> Zhengyi He,<sup>a</sup> Xuefei Xu,<sup>a</sup> Yulin Tang,<sup>a</sup> Chuncheng Hao<sup>b</sup> and Guizhen Wang<sup>\*a,b</sup>

<sup>a</sup> Key Laboratory of Tropical Biological Resources of Ministry of Education, Hainan University, Haikou 570228, China.

<sup>b</sup> Institute of Advanced Electrical Materials, Qingdao University of Science and Technology, Qingdao, China.

\*Corresponding author. Tel: +86 0898 66268172; Fax: +86 0898 66168037; E-mail address: wangguizhen0@hotmail.com.

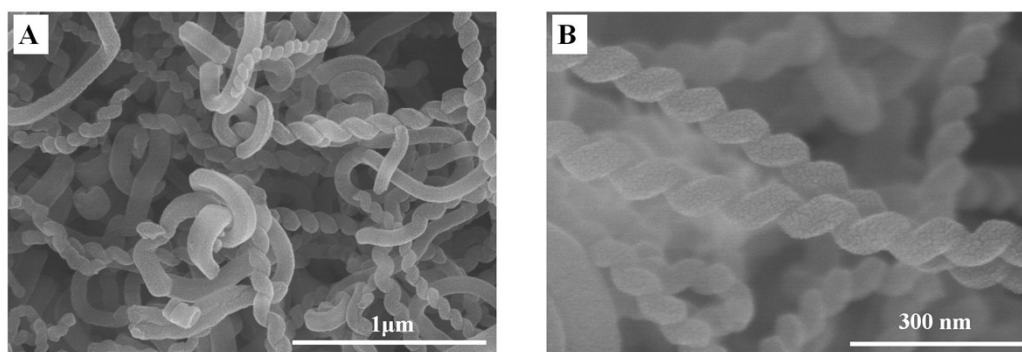

**Fig. S1.** SEM images of carbon fibers.

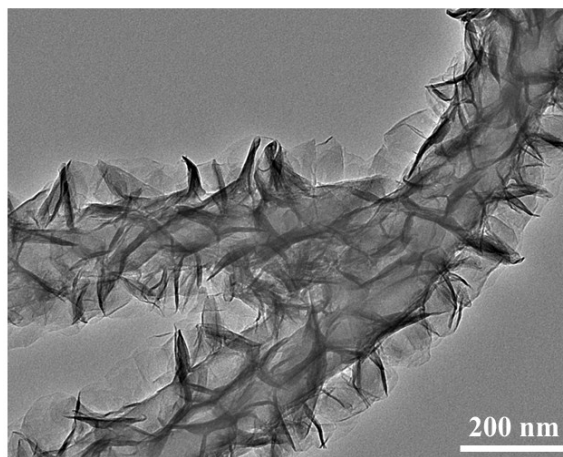

Fig. S2. TEM image of CF@NiAl-LDH.

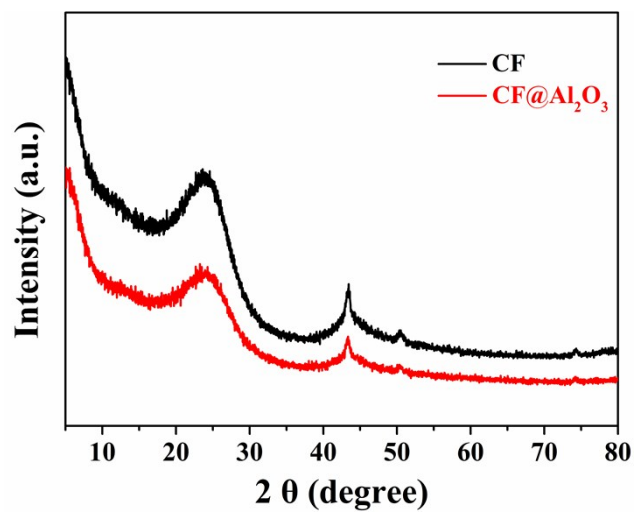

Fig. S3. XRD patterns of carbon fibers and CF@Al<sub>2</sub>O<sub>3</sub>.

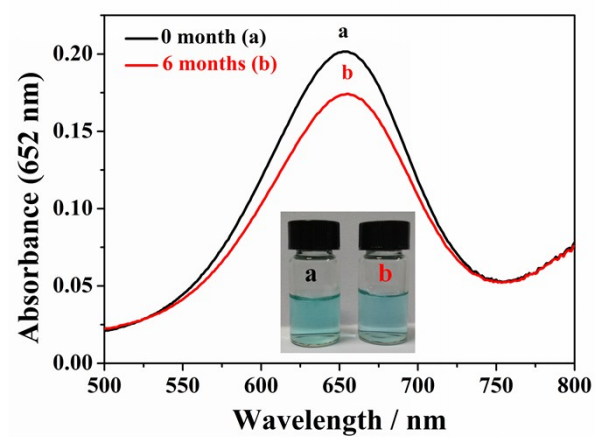

**Fig. S4.** UV-vis absorbance changes at 652 nm of TMB using CF@CuAl-LDH (a) and CF@CuAl-LDH after six-month storage (b).

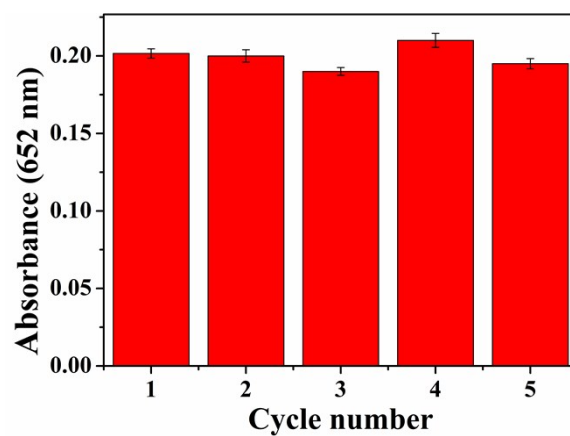

**Fig. S5.** UV-vis absorbance changes at 652 nm of reusability experiments.

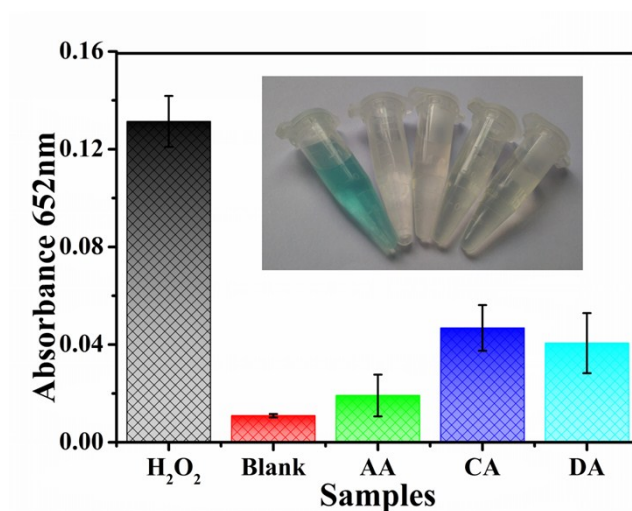

**Fig. S6.** Selectivity analysis for 2 mM H<sub>2</sub>O<sub>2</sub> detection and 5 mM of citric acid (CA), dopamine hydrochloride (DA) and L-ascorbic (AA) as the control group.

**Table S1.** Comparison of the apparent Michaelis-Menten constant ( $K_m$ ) and maximum reaction rate ( $V_{max}$ ).

| Catalyst    | $K_m$ (mM)                    |       | $V_{max}$ ( $10^{-8}$ M s <sup>-1</sup> ) |       | Reference         |
|-------------|-------------------------------|-------|-------------------------------------------|-------|-------------------|
|             | H <sub>2</sub> O <sub>2</sub> | TMB   | H <sub>2</sub> O <sub>2</sub>             | TMB   |                   |
| HRP         | 3.7                           | 0.434 | 8.71                                      | 10    | The reference [1] |
| CuO NPs     | 41                            | 0.016 | -                                         | -     | The reference [2] |
| Cu NCs      | 29.16                         | 11.9  | 4.22                                      | 5.96  | The reference [3] |
| Co-Al ELDH  | 22.13                         | 0.372 | 0.598                                     | 0.101 | The reference [4] |
| CF@CuAl-LDH | 0.59                          | 4.4   | 0.29                                      | 1.48  | This work         |

## References

- [1] L. Gao, J. Zhuang, L. Nie, J. Zhang, Y. Zhang, N. Gu, T. Wang, J. Feng, D. Yang, S. Perrett and X. Yan, *Nat. Nanotechnol.*, 2007, **2**, 577-583.
- [2] W. Chen, J. Chen, Y.B. Feng, L. Hong, Q. Chen, L. Wu, X. Lin and X. Xia, *Analyst.*, 2012, **137**, 1706-1712.
- [3] L. Hu, Y. Yuan, L. Zhang, J. Zhao, S. Majeed and G. Xu, *Anal. Chim. Acta.*, 2013, **762**, 83-86.
- [4] L. Chen, B. Sun, X. Wang, F. Qiao and S. Ai, *J Mater Chem B.*, 2013, **1**, 2268-2274.
